# Supplementary material for: Insights into H-aggregates and CH⋯O hydrogen bond mediated self-assembly of pyromellitic bisimide
Source: Royal Society of Chemistry journal article supplement (doi:10.1039/c2ce25778e), 2012-01-01
Supplement: c2ce25778e.pdf [file c2ce25778e.pdf]

## Electronic supplementary information (ESI)

### Insights into H-aggregates and CH•••O hydrogen bonds mediated self-assembly of pyromellitic bisimide

Poulami Jana, Sibaprasad Maity, Suman Kumar Maity, Pradip Kumar Ghorai and Debasish Haldar\*

Department of Chemical Sciences, Indian Institute of Science Education and Research –Kolkata,

Mohanpur, West Bengal- 741252, India.

E-mail: [deba\\_h76@yahoo.com](mailto:deba_h76@yahoo.com), [deba\\_h76@iiserkol.ac.in](mailto:deba_h76@iiserkol.ac.in)

#### Table of contents

|          |   |          |    |
|----------|---|----------|----|
| Fig. S1  | 2 | Fig. S8  | 7  |
| Fig. S2  | 3 | Fig. S9  | 8  |
| Fig. S3  | 4 | Fig. S10 | 9  |
| Fig. S4  | 4 | Fig. S11 | 9  |
| Table S1 | 5 | Fig. S12 | 10 |
| Fig. S5  | 5 | Fig. S13 | 10 |
| Fig. S6  | 6 | Fig. S14 | 11 |
| Fig. S7  | 7 | Fig. S15 | 11 |

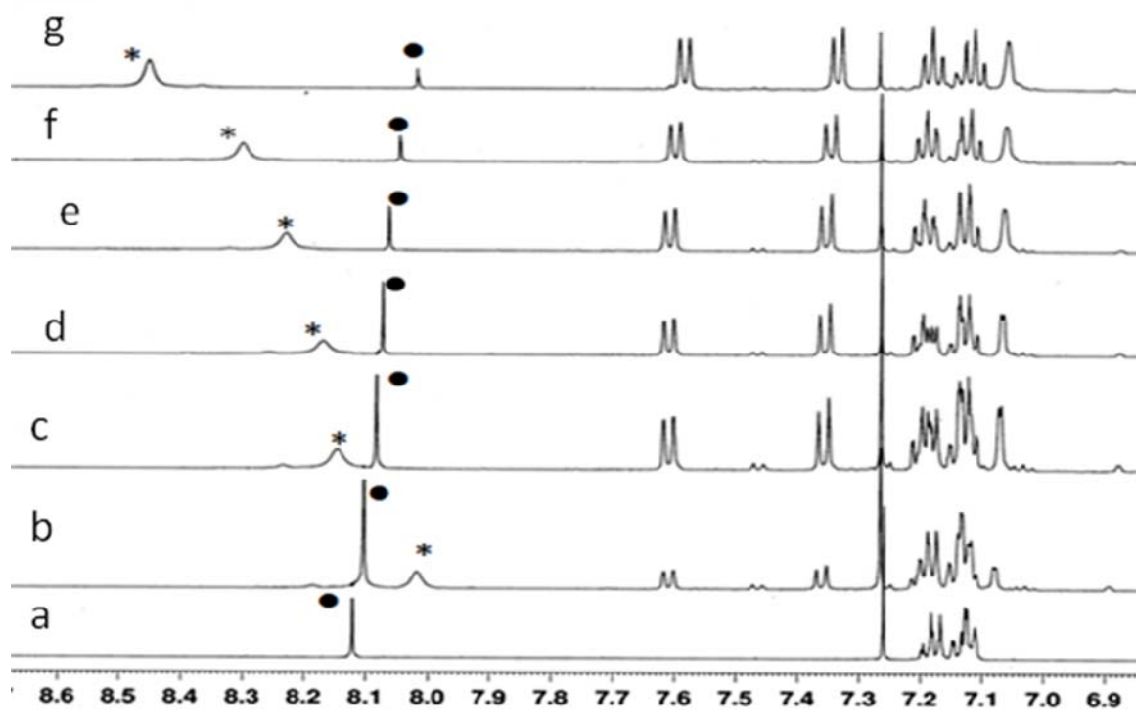

**Fig. S1.** NMR titration of bisimide receptor **1** in CDCl<sub>3</sub> at 14.80mM (500 MHz, 25 °C) with (a) 0.000, (b) 3.7, (c) 6.12, (d) 10.30, (e) 12.65 (f) 17.03 and (g) 44.32 mM of tryptophan methyl ester. The black circle indicate pyromelic ring protons, and \* indicates Trp ring NH proton.

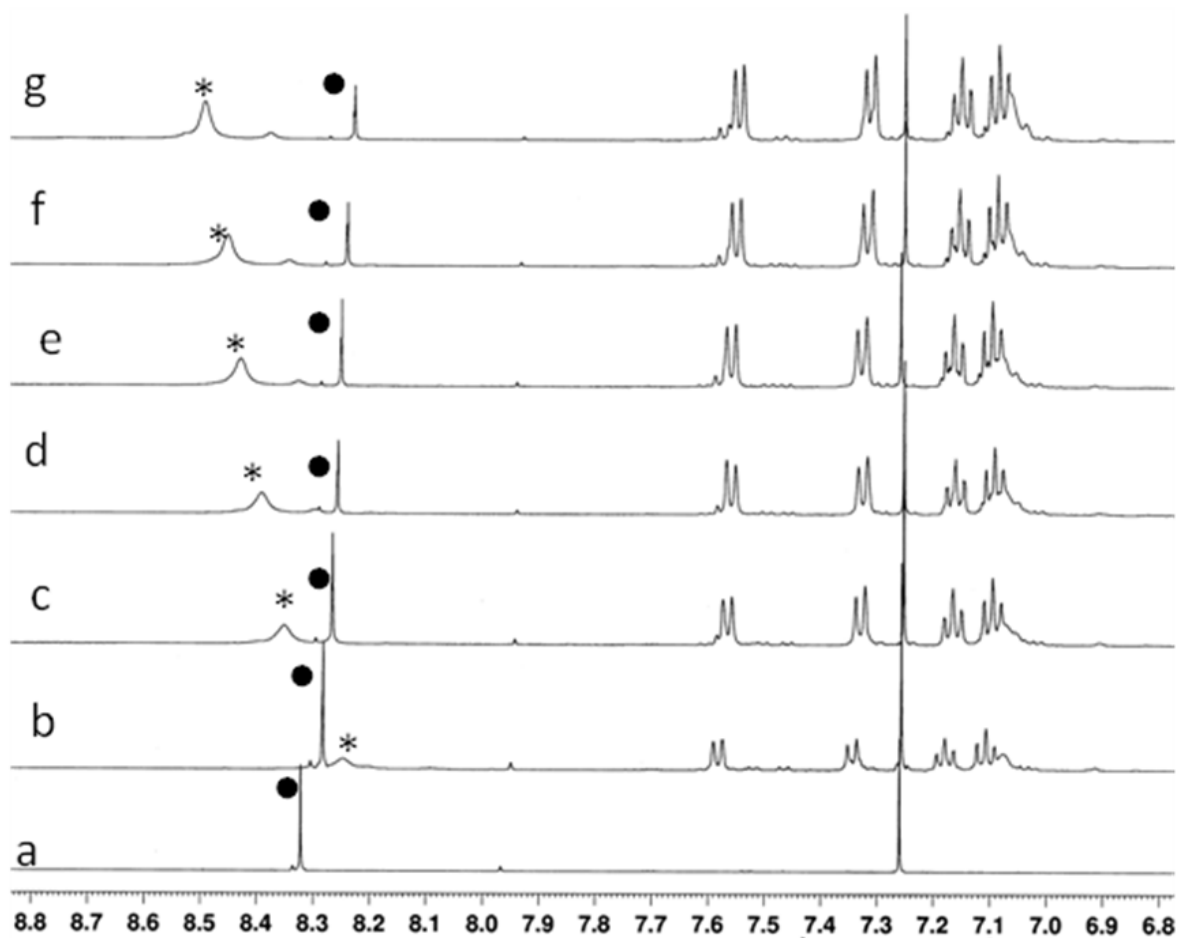

**Fig. S2.** NMR titration of bisimide receptor **2** in CDCl<sub>3</sub> at 16.93 mM (500 MHz, 25 °C) with (a) 0.000, (b) 8.06, (c) 13.43, (d) 18.45, (e) 21.03 (f) 28.59 and (g) 31.24 mM of tryptophan methyl ester. The black circle indicate pyromellitic ring protons, and \* indicates Trp ring NH proton.

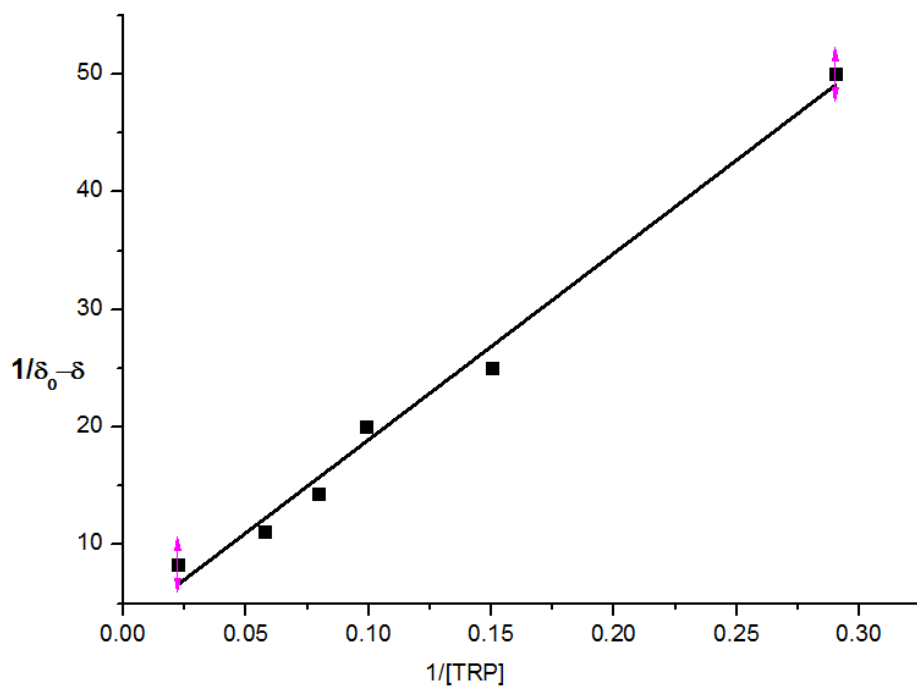

**Fig. S3.** B-H plot of bisimide 1-tryptophan complex from NMR titration experiments showing 1:1 complex formation.

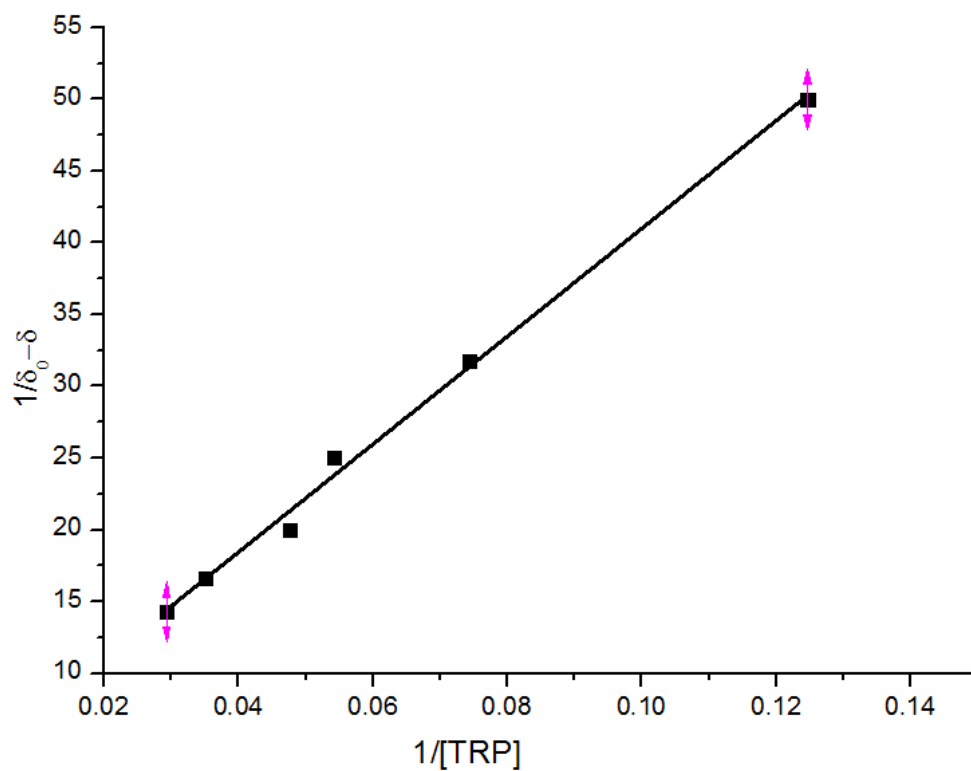

**Fig. S4.** B-H plot of bisimide 2-tryptophan complex.

**Table S1:** Binding constants of bisimides and tryptophan complexes.

| Complex               | $K_{\text{binding constant}} (M^{-1})$ | stoichiometric ratio |
|-----------------------|----------------------------------------|----------------------|
| Bisimide 1-tryptophan | $2.94 \times 10^2$                     | 1:1                  |
| Bisimide 2-tryptophan | $9.06 \times 10$                       | 1:1                  |

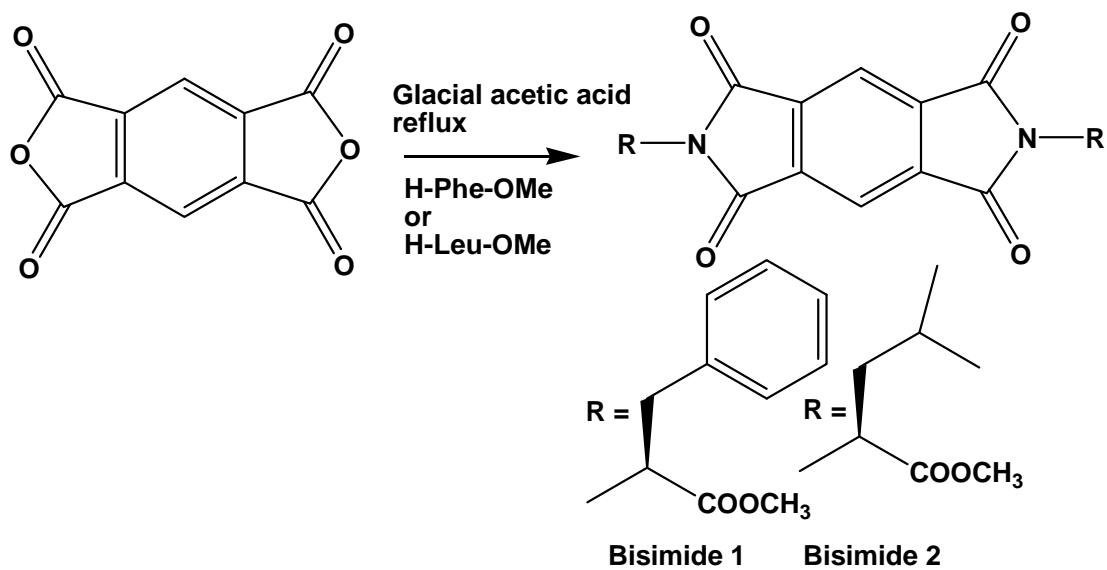

**Fig. S5.** Schematic presentation of synthesis of bisimides 1 and 2 .

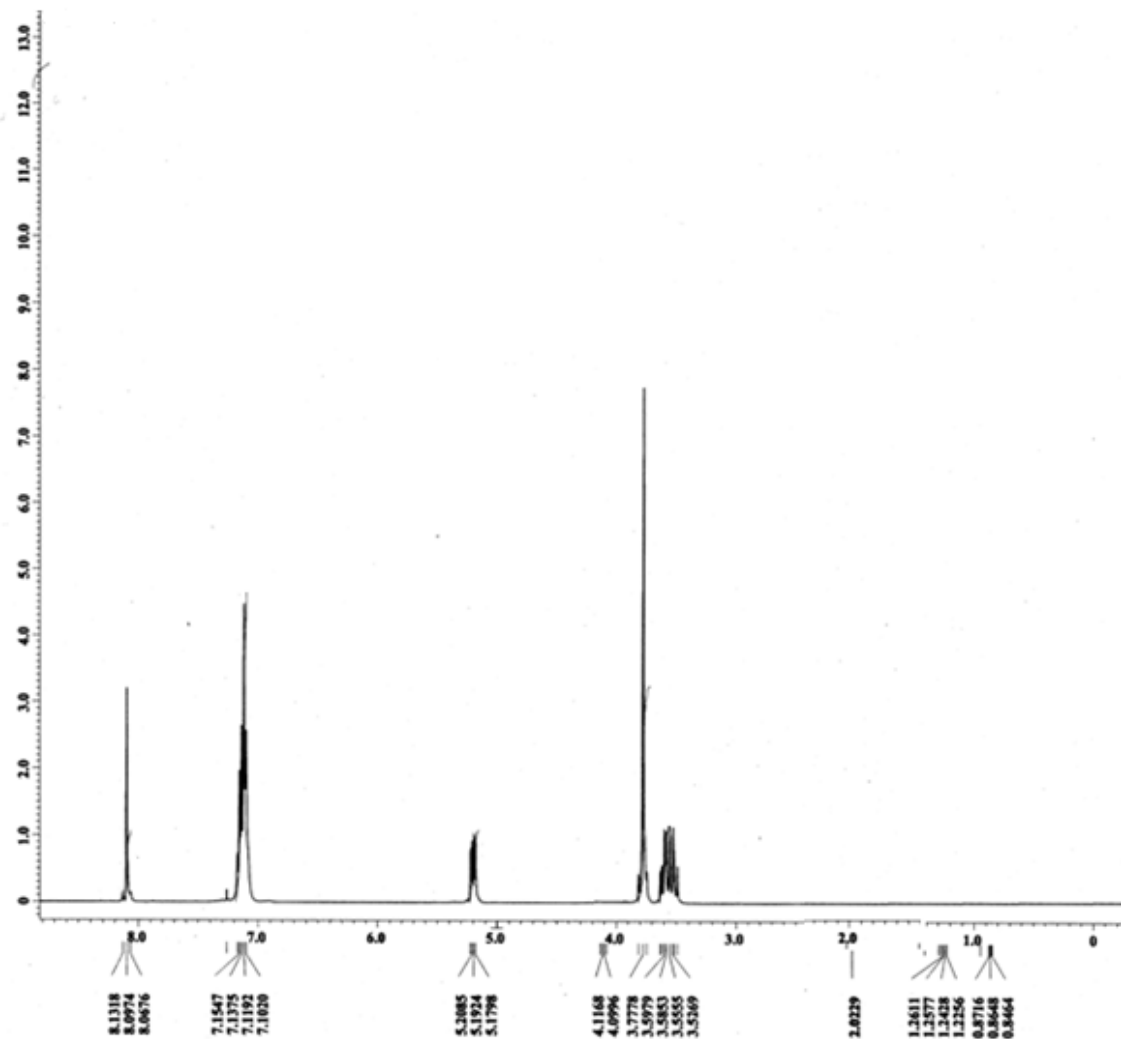

Fig. S6.  $^1\text{H}$  NMR (400MHz,  $\text{CDCl}_3$ ) spectra of bisimide 1.

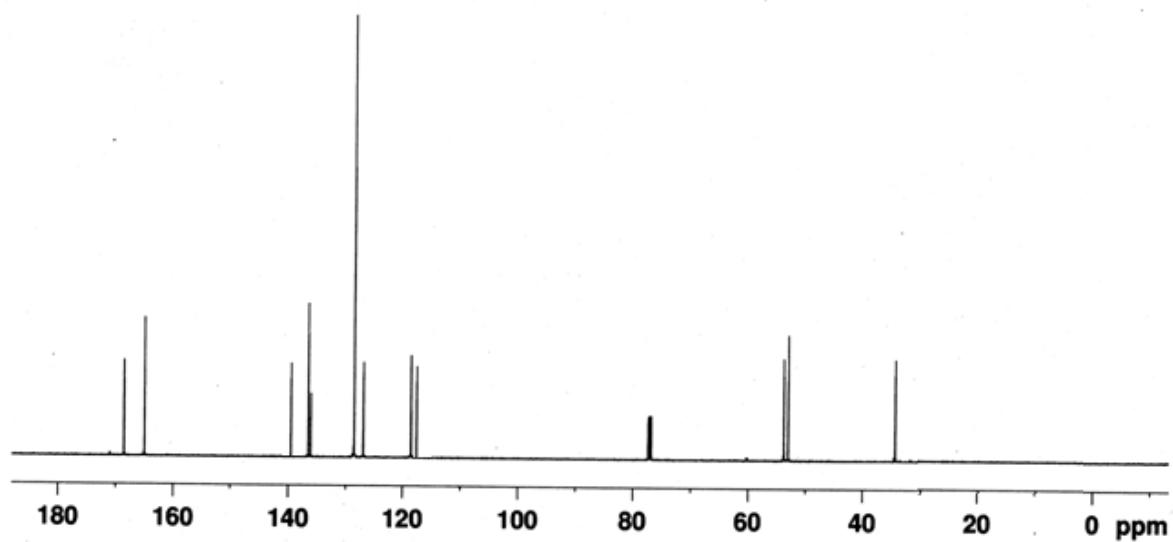

Fig. S7.  $^{13}\text{C}$  NMR (125MHz,  $\text{CDCl}_3$ ) spectra of bisimide 1.

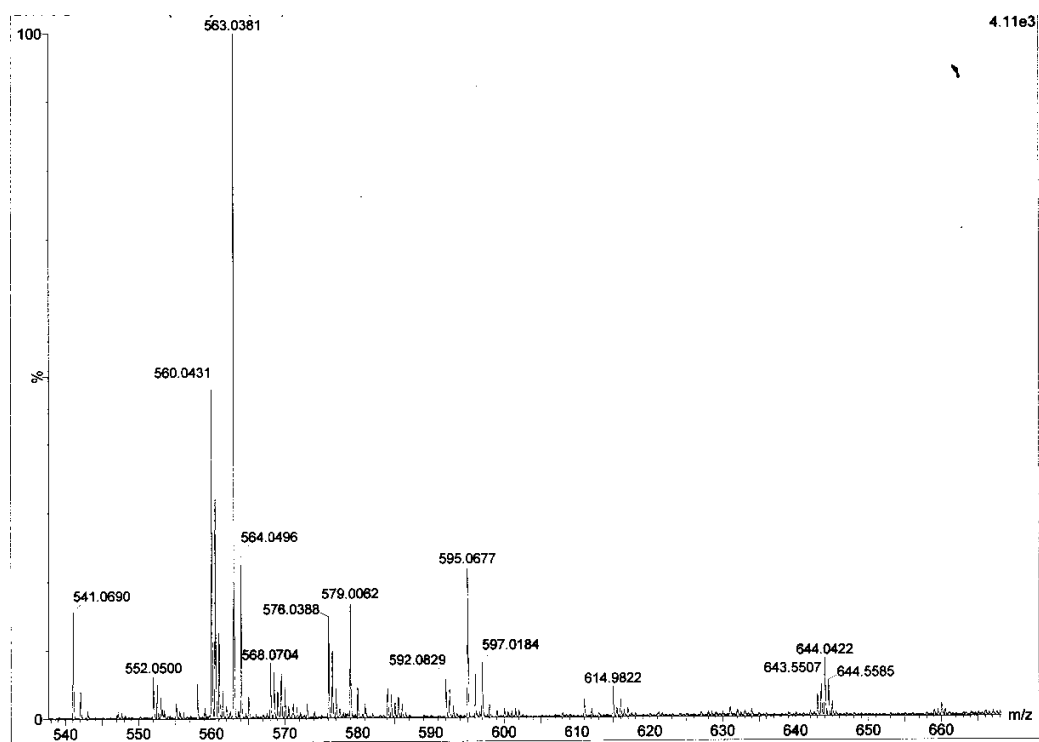

Fig. S8. Mass spectra of bisimide 1.

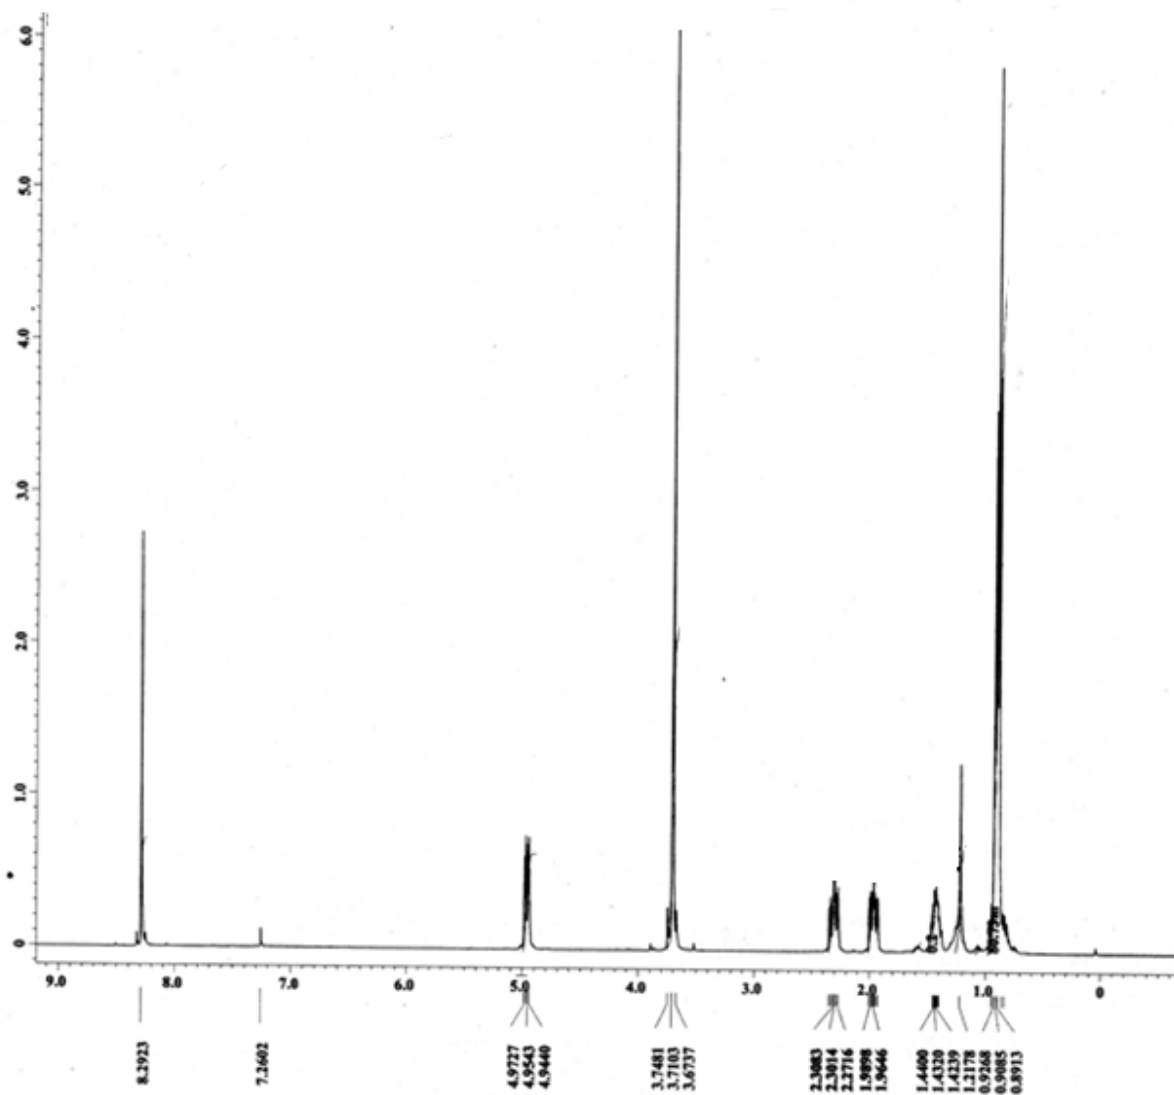

Fig. S9.  $^1\text{H}$  NMR spectra of bisimide **2** in  $\text{CDCl}_3$ .



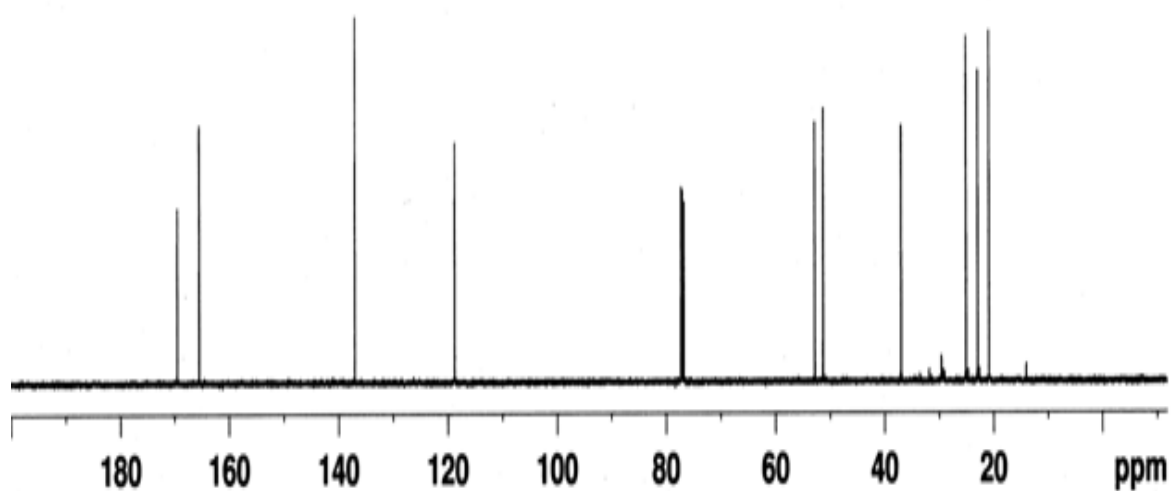

Fig. S10.  $^{13}\text{C}$  NMR spectra of bisimide **2** in  $\text{CDCl}_3$ .

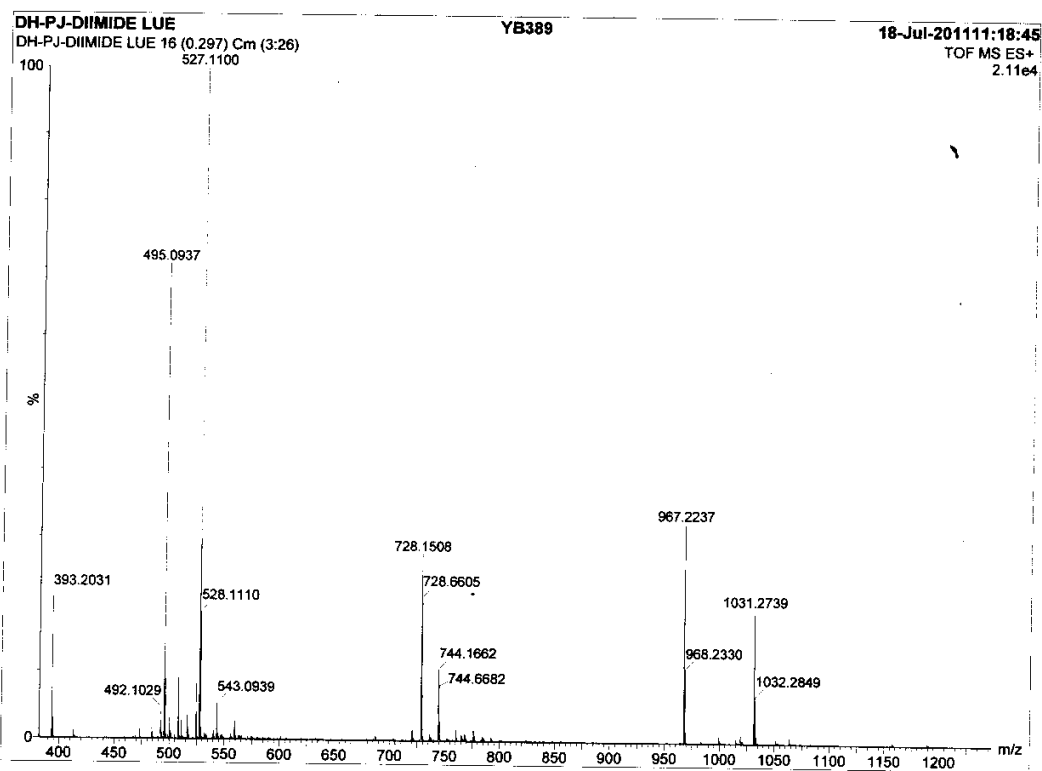

Fig. S11. Mass spectra of bisimide **2**.

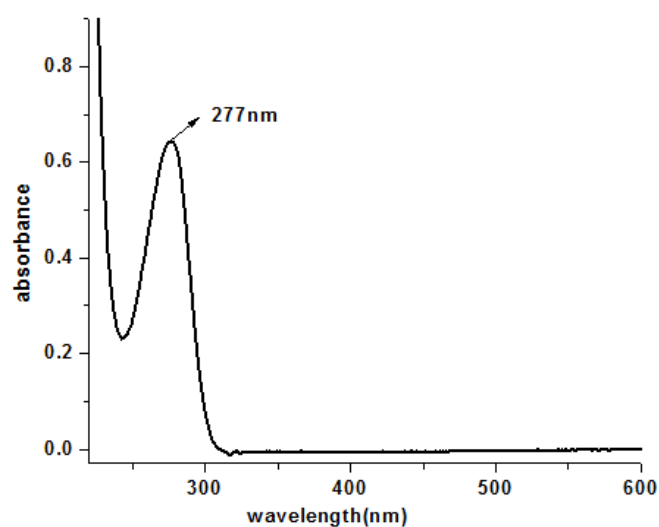

**Fig. S12:** absorption of Tryptophan methyl ester in chloroform, [0.00759mM].

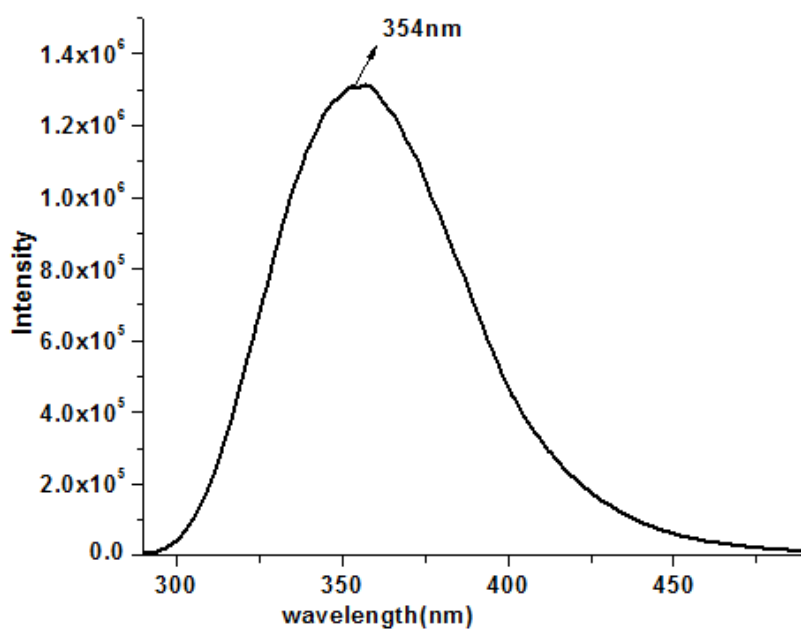

**Fig. S13:** Emission spectra of Tryptophan methyl ester in chloroform, [0.00759mM].

Optical rotation of bisimide **1** [ $\alpha$ ] = -0.765, bisimide **2** [ $\alpha$ ] = -1.952.

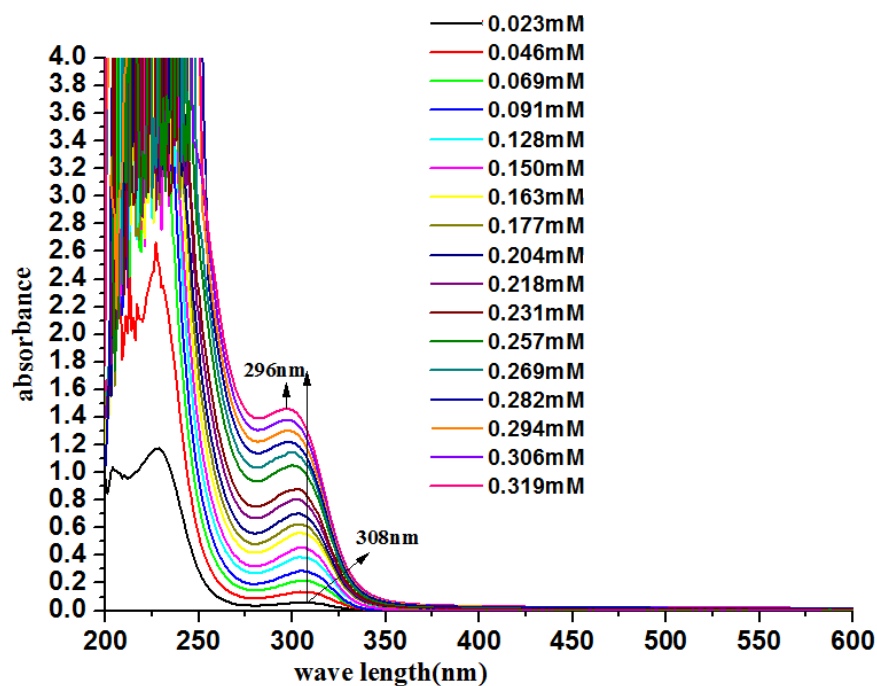

**Fig. S14:** Concentration dependent UV/vis spectra of bisimide 1 in full range.

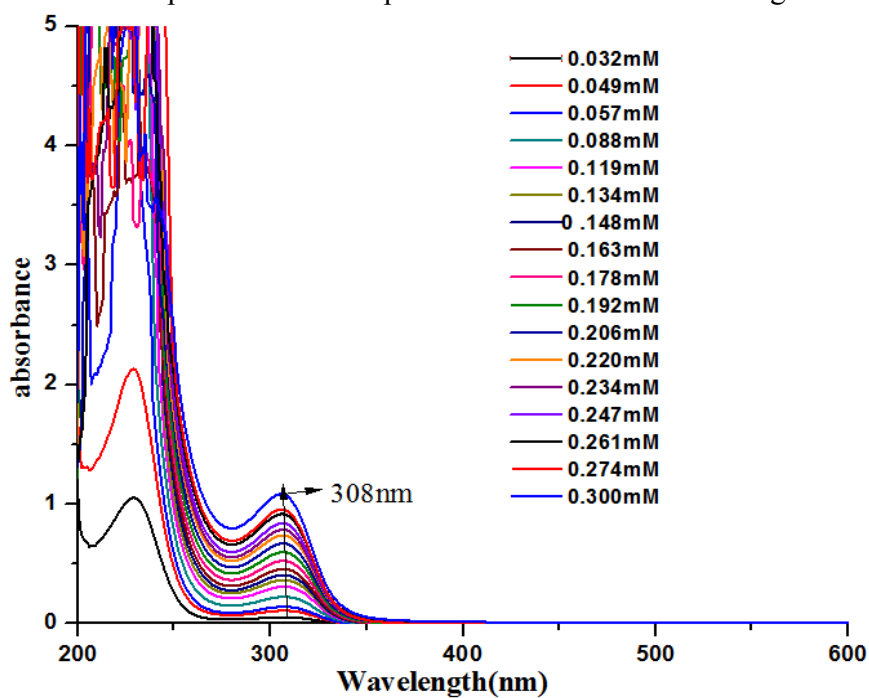

**Fig. S15:** Concentration dependent UV/vis spectra of bisimide 2 in full range.
